# Supplementary material
Source: Springer Nature journal article supplement (https://www.springermedizin.de/resource/supplementary/12875_2012_792_MOESM4_ESM.pdf/9435436)

**BARRIERS TO UNDERSTANDING ONE ANOTHER:**

- Physician internal conflict
- Denial of patient's condition
- Unattainable goals & expectations
- Family Discord/ Dysfunction
- Mistrust of system
- Prior negative health care experiences
- Language barrier
- Cultural/Religious value differences
- Legal Concerns
- Taking conflict personally
- Being inflexible

SDM = Substitute Decision-Maker

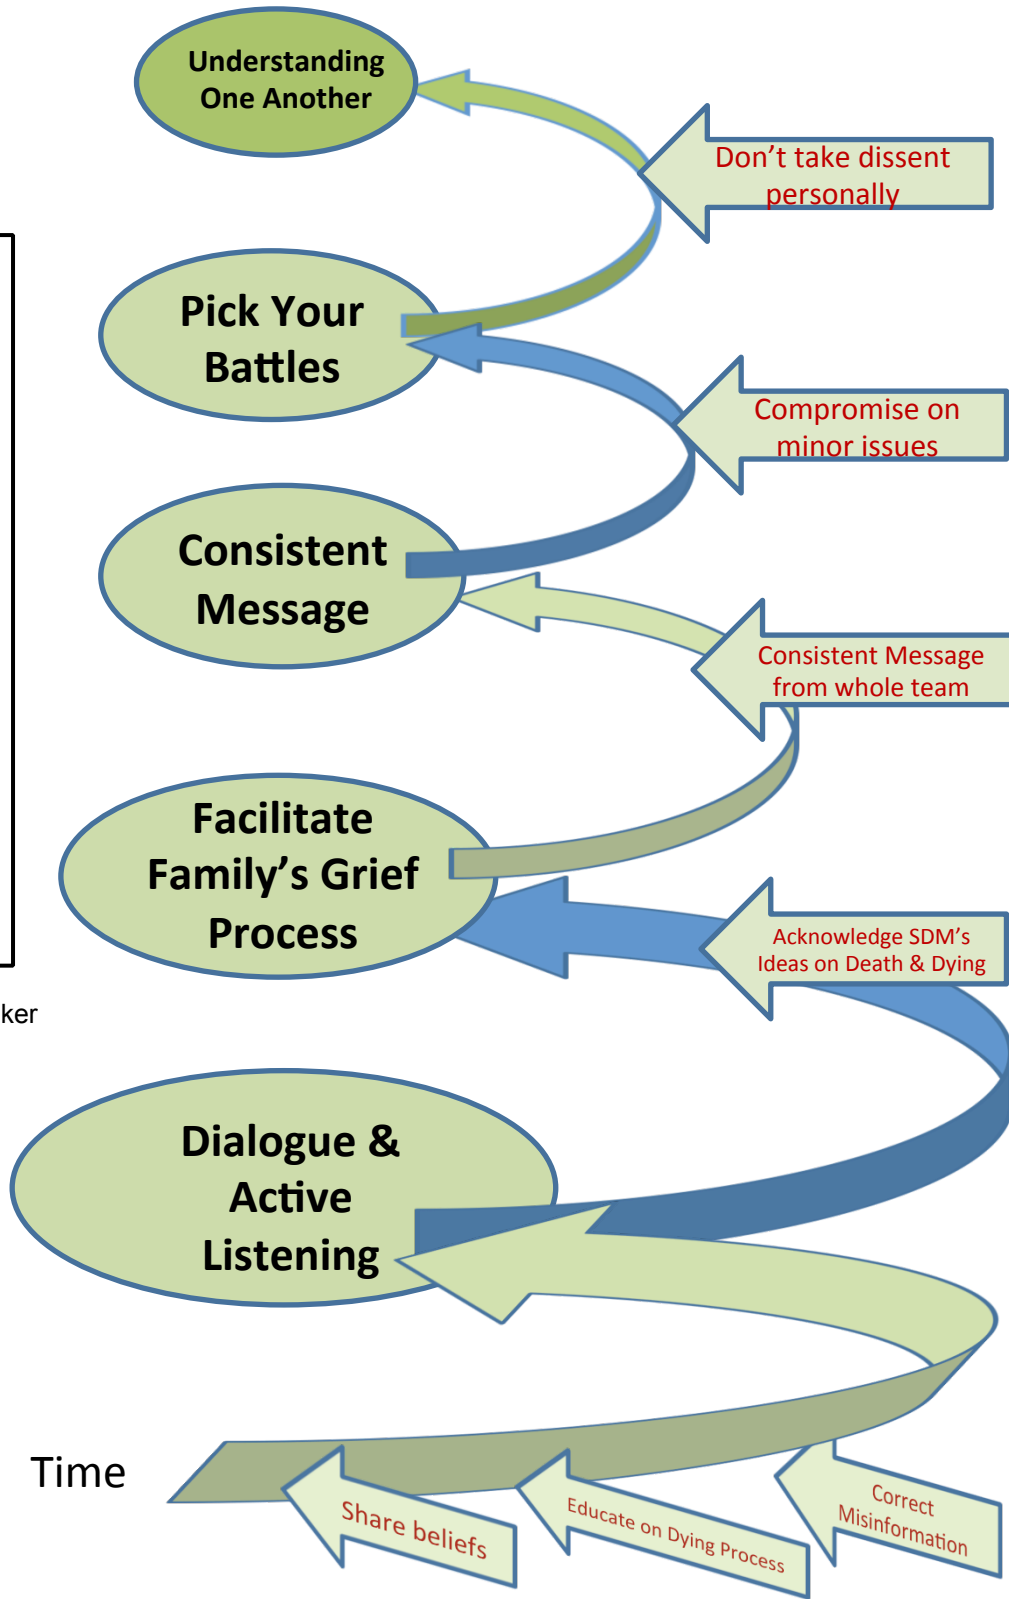

Supplement: MOESM4 [file 9435436]
